# Supplementary material for: Novel syntheses of carbazole-3,6-dicarboxylate ligands and their utilization for porous coordination cages
Source: Royal Society of Chemistry journal article supplement (doi:10.1039/d0dt01149e), 2020-01-01
Supplement: d0dt01149e1.pdf [file d0dt01149e1.pdf]

Electronic Supplementary Information for:

**Novel syntheses of carbazole-3,6-dicarboxylate ligands and their utilization for porous coordination cages**

Casey A. Rowland,<sup>a</sup> P. A. Yap<sup>a</sup> and Eric D. Bloch<sup>\*,a</sup>

<sup>a</sup>Department of Chemistry and Biochemistry, University of Delaware, Newark, Delaware 19716, United States

*Dalton Trans.*

## List of Contents

|                                                                  |     |
|------------------------------------------------------------------|-----|
| NMR Spectra of Ligands                                           | S3  |
| Crystal Structures of Organic Ligands                            | S5  |
| Crystal Structures of $\text{Cu}_{12}(\text{9-benzyl-cdc})_{12}$ | S8  |
| $\text{CO}_2$ Gas Adsorption Isotherms                           | S10 |
| Crystallographic Tables                                          | S16 |

General Considerations: Benzyl bromide and 9-H carbazole were purchased from Combi-Blocks. Aluminum chloride, bromine, NaOH, KOH, and all solvents were purchased from Sigma-Aldrich at purity of 98% or higher.

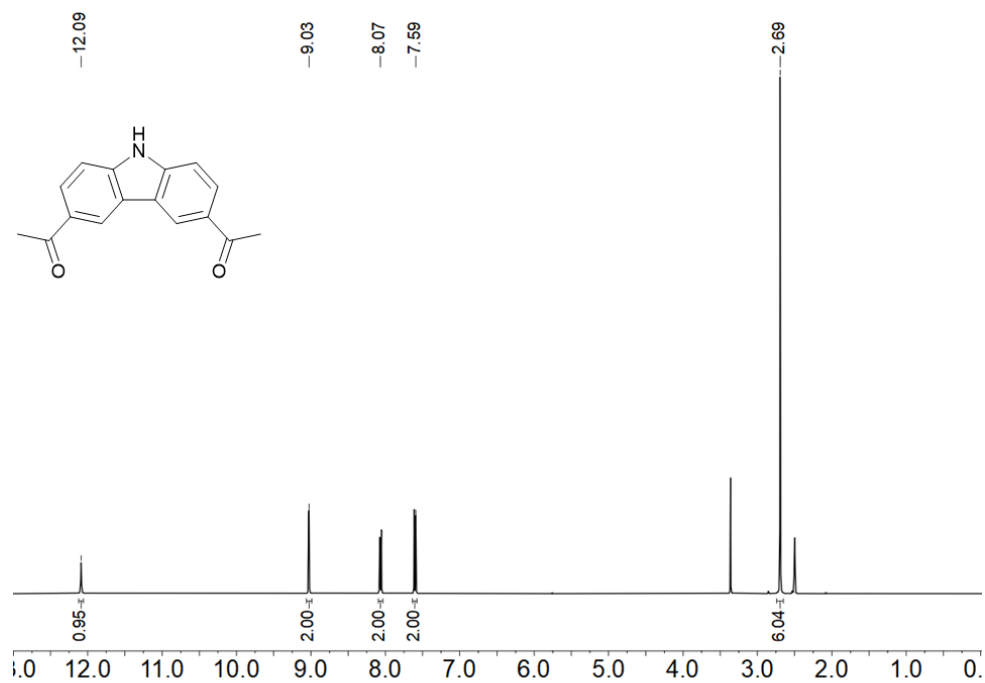

**Figure S1.** NMR spectra of 3,6-diacetyl-9H-carbazole.

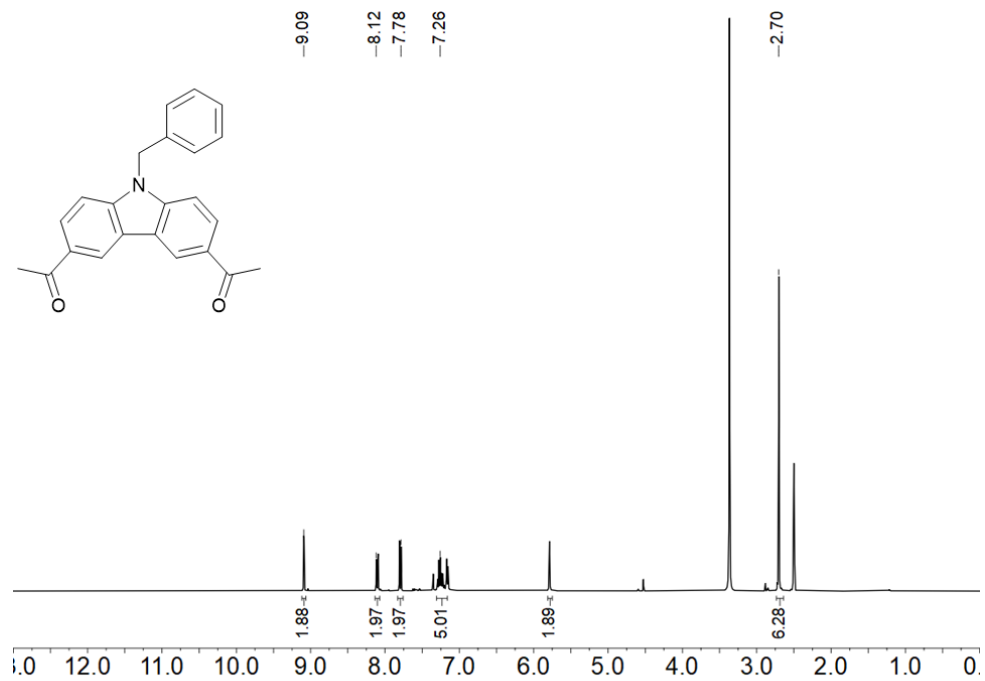

**Figure S2.** NMR spectra of 3,6-diacetyl-9-benzyl-carbazole.

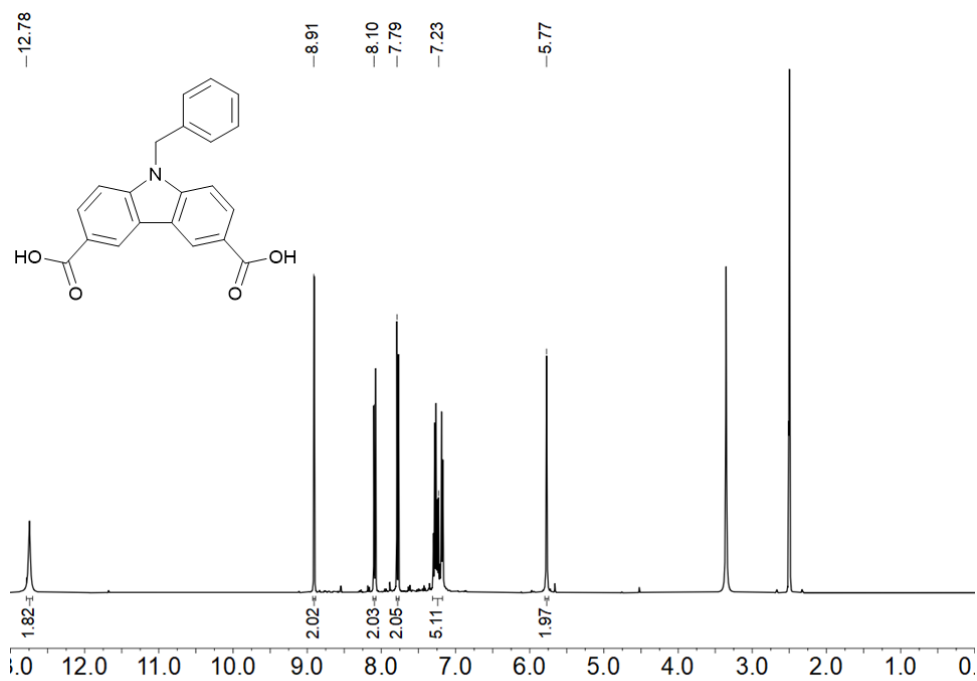

**Figure S3.** NMR spectra of 9-benzyl-carbazole-3,6-dicarboxylic acid.

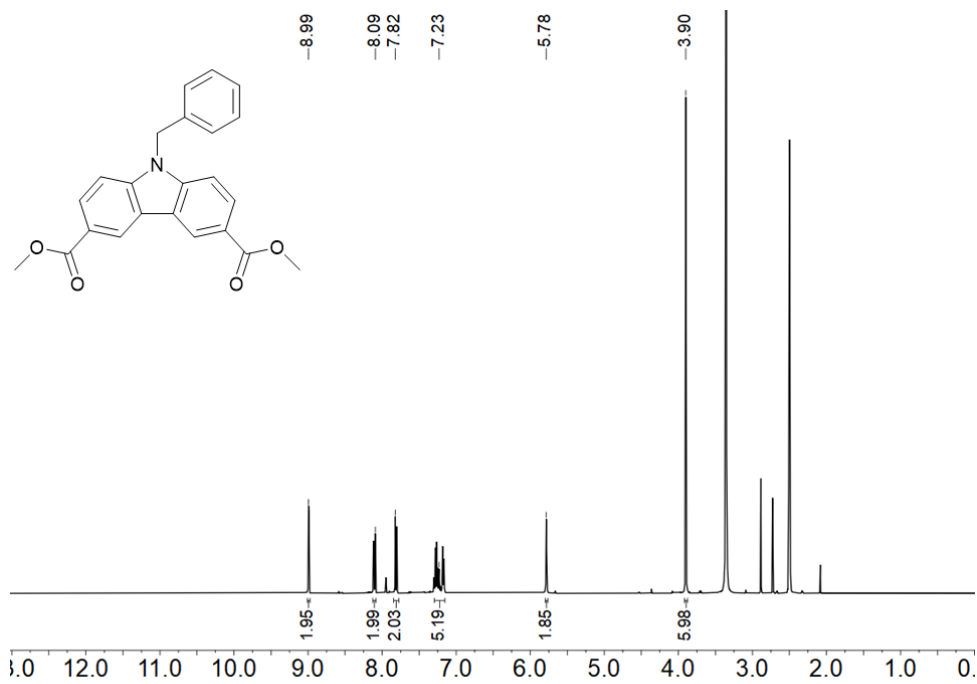

**Figure S4.** NMR spectra of Dimethyl 9-benzyl-carbazole-3,6-dicarboxylate.

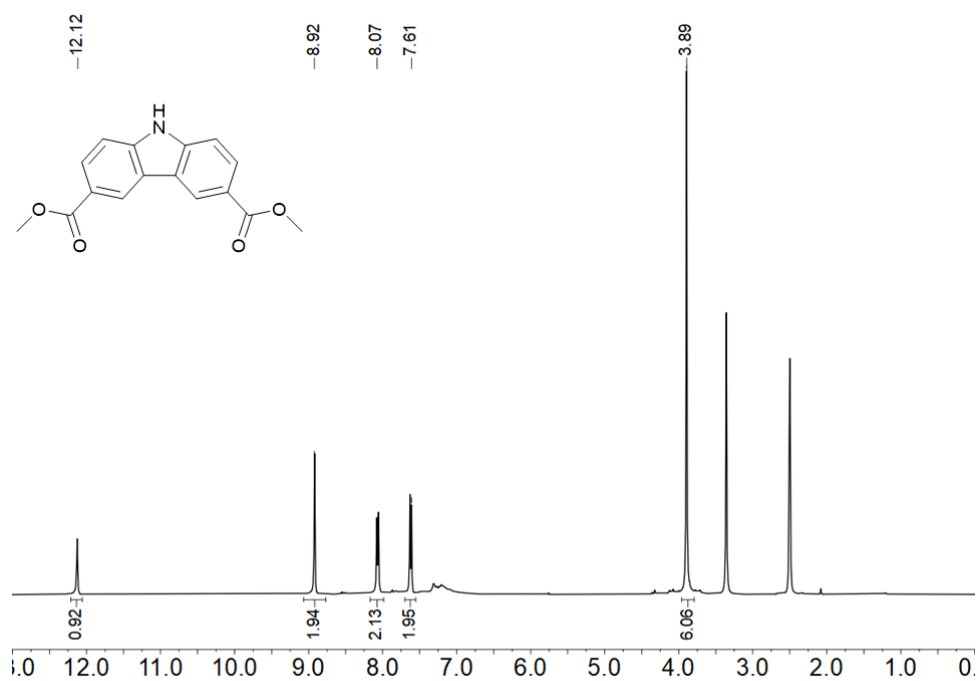

**Figure S5.** NMR spectra of Dimethyl 9H-carbazole-3,6-dicarboxylate.

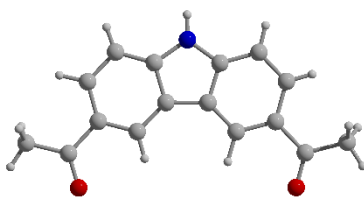

**Figure S6.** Crystal structure of 3,6-diacetyl-9H-carbazole.

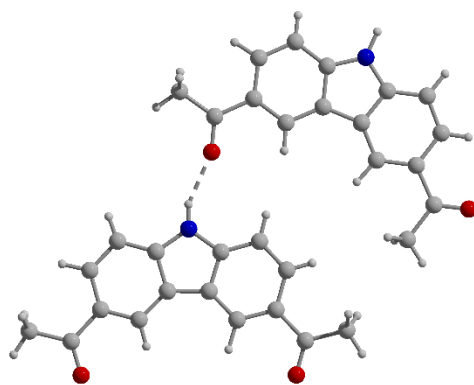

**Figure S7.** Packing diagram of 3,6-diacetyl-9H-carbazole displaying the H-bonding interaction between molecules.

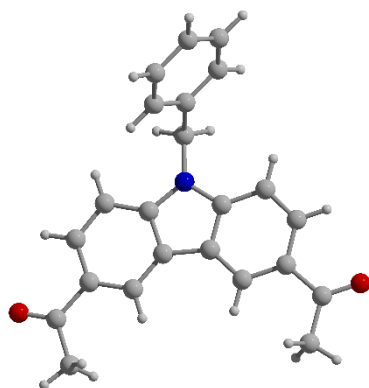

**Figure S8.** Crystal structure of 3,6-diacetyl-9-benzyl-carbazole.

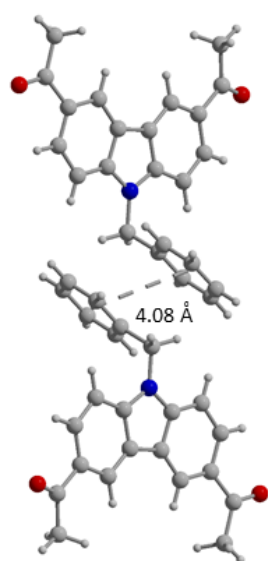

**Figure S9.** Packing diagram of 3,6-diacetyl-9H-carbazole displaying the benzyl-to-benzyl  $\pi$ - $\pi$  interactions between molecules.

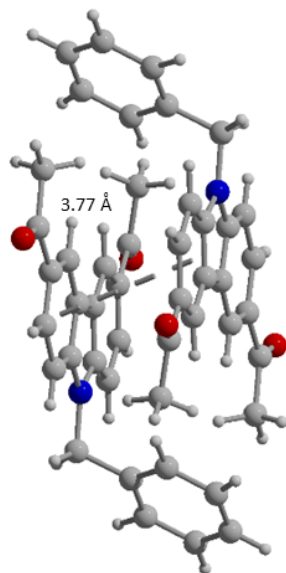

**Figure S10.** Packing diagram of 3,6-diacetyl-9H-carbazole displaying the carbazole-to-carbazole  $\pi$ - $\pi$  interactions between molecules.

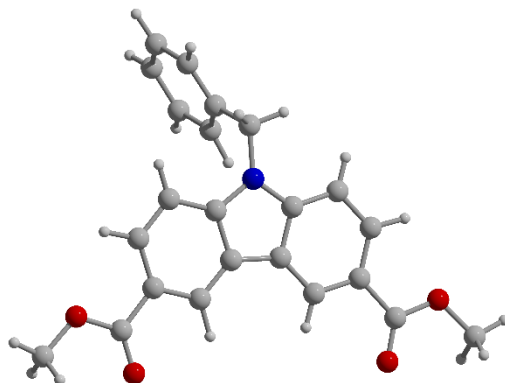

**Figure S11.** Crystal structure of Dimethyl 9-benzyl-carbazole-3,6-dicarboxylate.

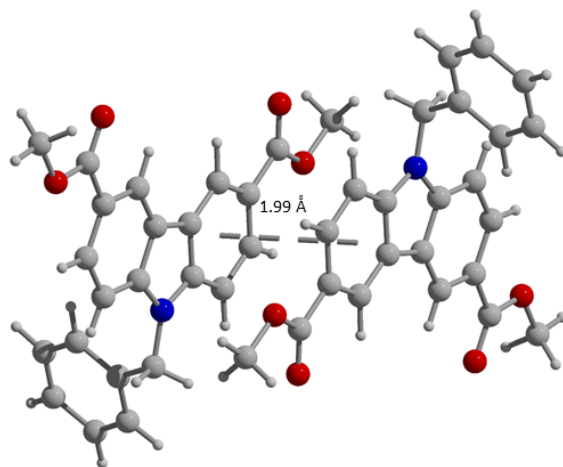

**Figure S12.** Packing diagram of Dimethyl 9-benzyl-carbazole-3,6-dicarboxylate displaying the  $\pi$ - $\pi$  interactions between molecules.

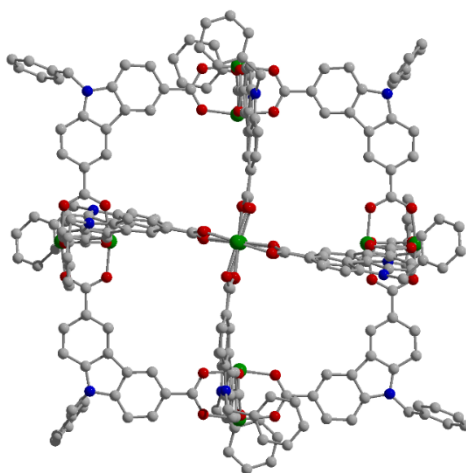

**Figure S13.** Crystal structure of Cu<sub>12</sub>(9-benzyl-cdc)<sub>12</sub> displaying the pinwheel-like orientation of the ligands. H-atoms have been omitted for clarity.



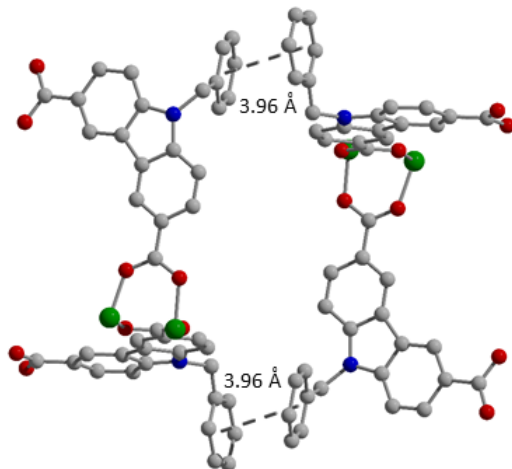

**Figure S14.** Packing diagram of Cu<sub>12</sub>(9-benzyl-cdc)<sub>12</sub> displaying the benzyl-to-benzyl  $\pi$ - $\pi$  interaction between cages. H-atoms have been omitted for clarity.

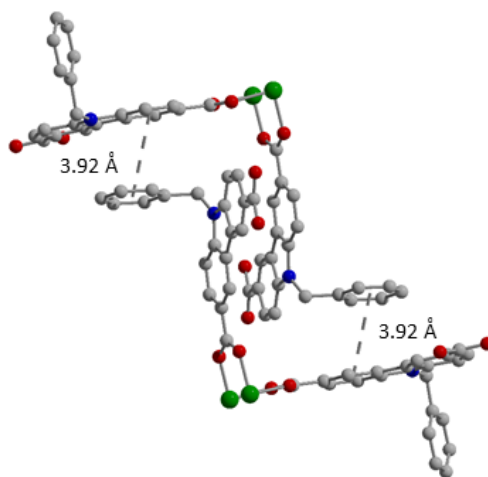

**Figure S15.** Packing diagram of Cu<sub>12</sub>(9-benzyl-cdc)<sub>12</sub> displaying the benzyl-to-carbazole  $\pi$ - $\pi$  interactions between cages. H-atoms have been omitted for clarity.

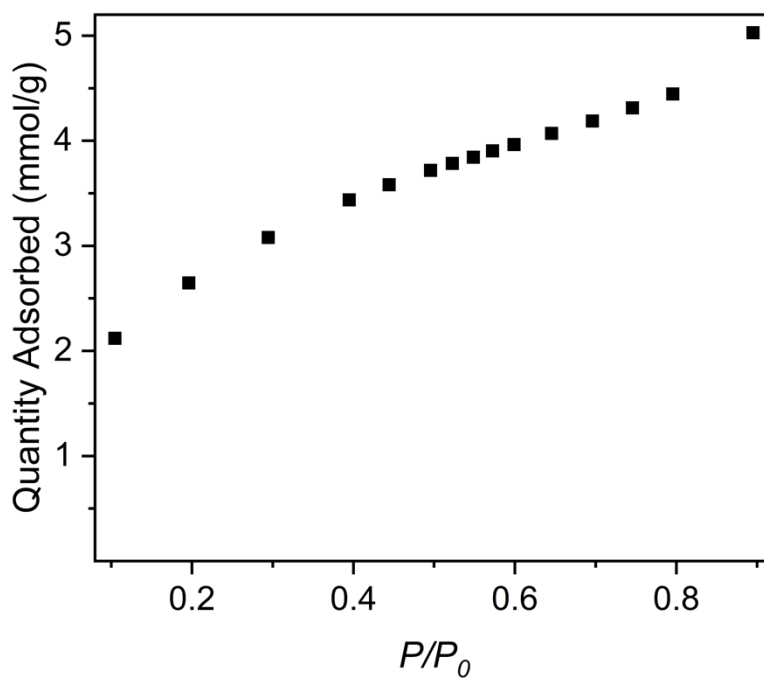

**Figure S16.** CO<sub>2</sub> adsorption in Cu<sub>12</sub>(9-benzyl-cdc)<sub>12</sub> at 195 K. The sample was degassed at 25 °C under flowing N<sub>2</sub>.

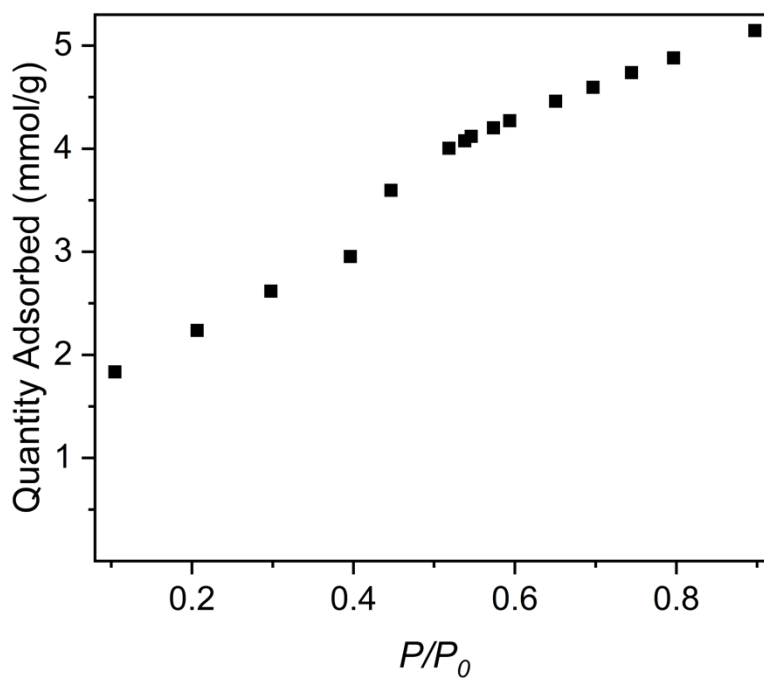

**Figure S17.** CO<sub>2</sub> adsorption in Cu<sub>12</sub>(9-benzyl-cdc)<sub>12</sub> at 195 K. The sample was degassed at 50 °C under flowing N<sub>2</sub>.

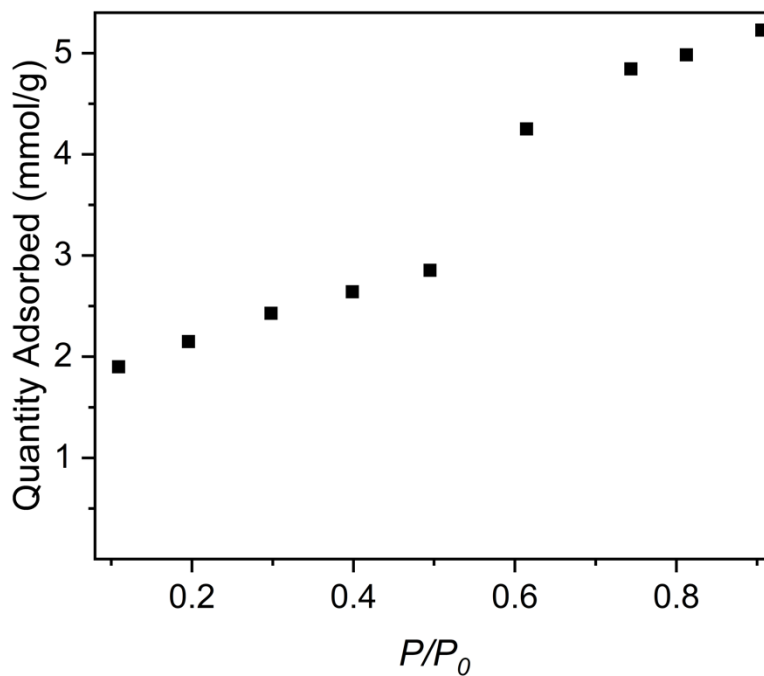

**Figure S18.** CO<sub>2</sub> adsorption in Cu<sub>12</sub>(9-benzyl-cdc)<sub>12</sub> at 195 K. The sample was degassed at 75 °C under flowing N<sub>2</sub>.

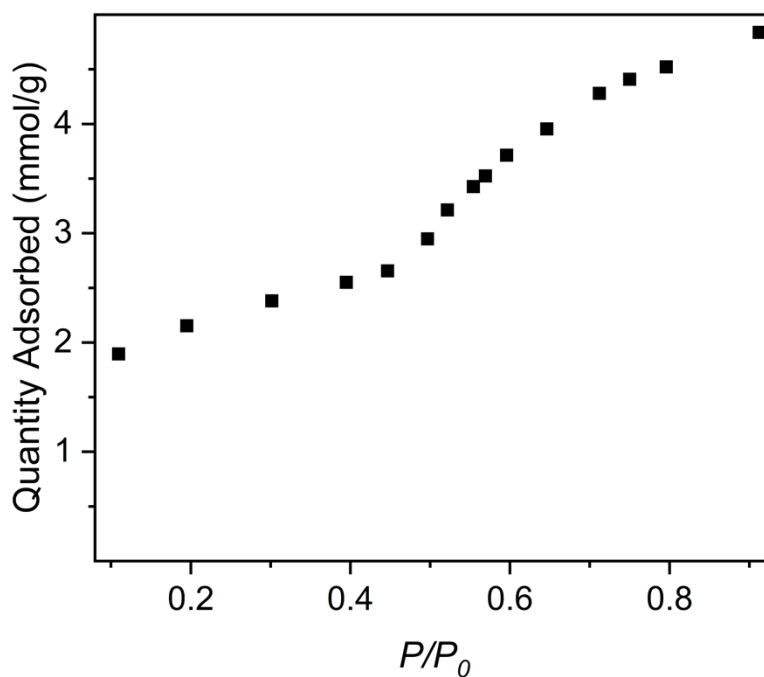

**Figure S19.** CO<sub>2</sub> adsorption in Cu<sub>12</sub>(9-benzyl-cdc)<sub>12</sub> at 195 K. The sample was degassed at 100 °C under flowing N<sub>2</sub>.

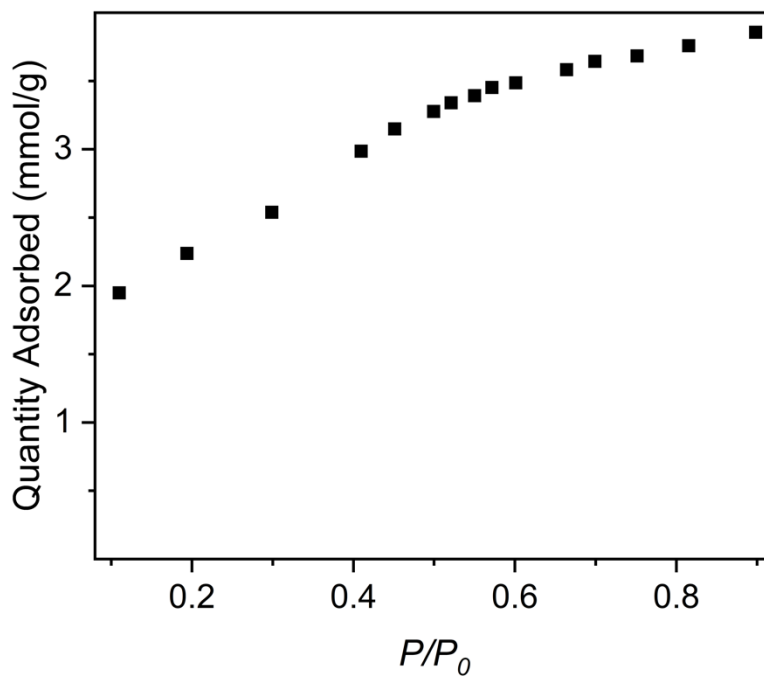

**Figure S20.** CO<sub>2</sub> adsorption in Cu<sub>12</sub>(9-benzyl-cdc)<sub>12</sub> at 195 K. The sample was degassed at 125 °C under flowing N<sub>2</sub>.

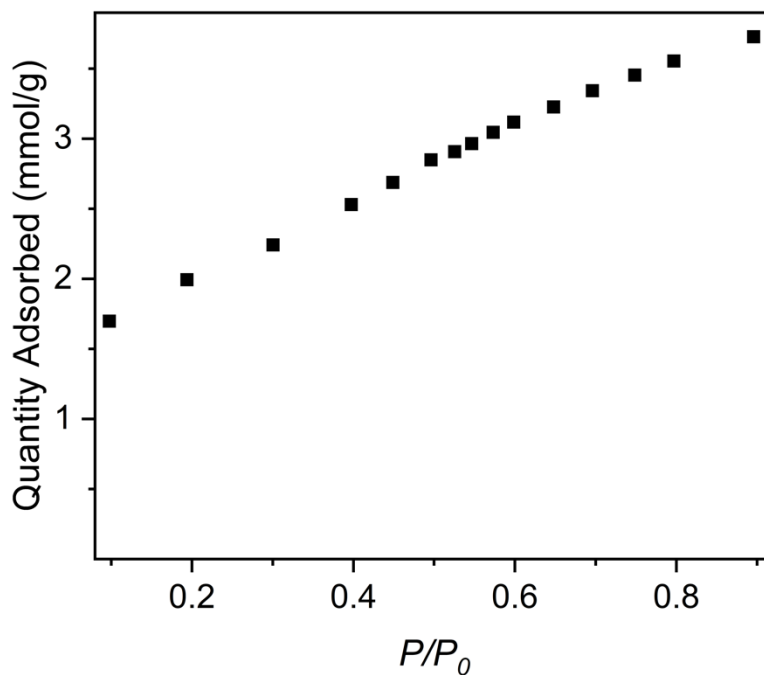

**Figure S21.** CO<sub>2</sub> adsorption in Cu<sub>12</sub>(9-benzyl-cdc)<sub>12</sub> at 195 K. The sample was degassed at 150 °C under flowing N<sub>2</sub>.

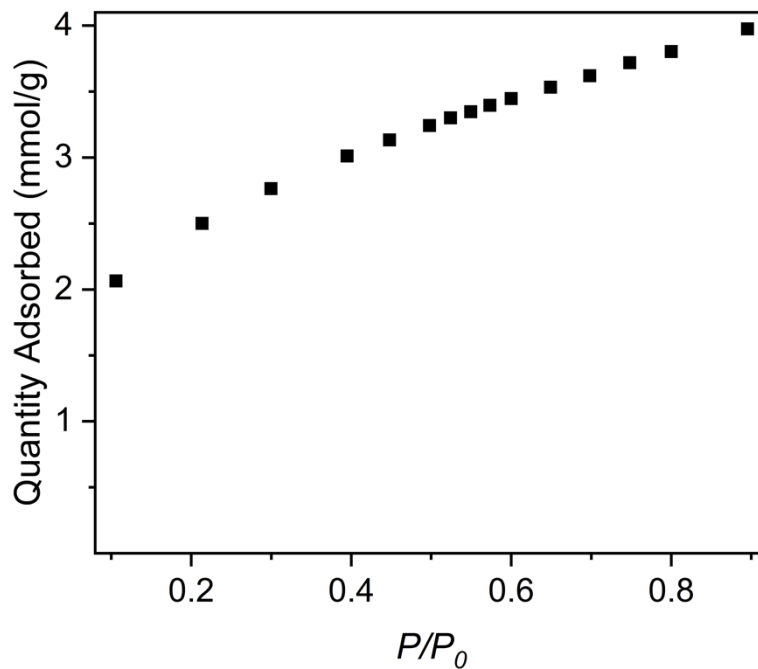

**Figure S22.** CO<sub>2</sub> adsorption in Cu<sub>12</sub>(9-benzyl-cdc)<sub>12</sub> at 195 K. The sample was degassed at 175 °C under flowing N<sub>2</sub>.

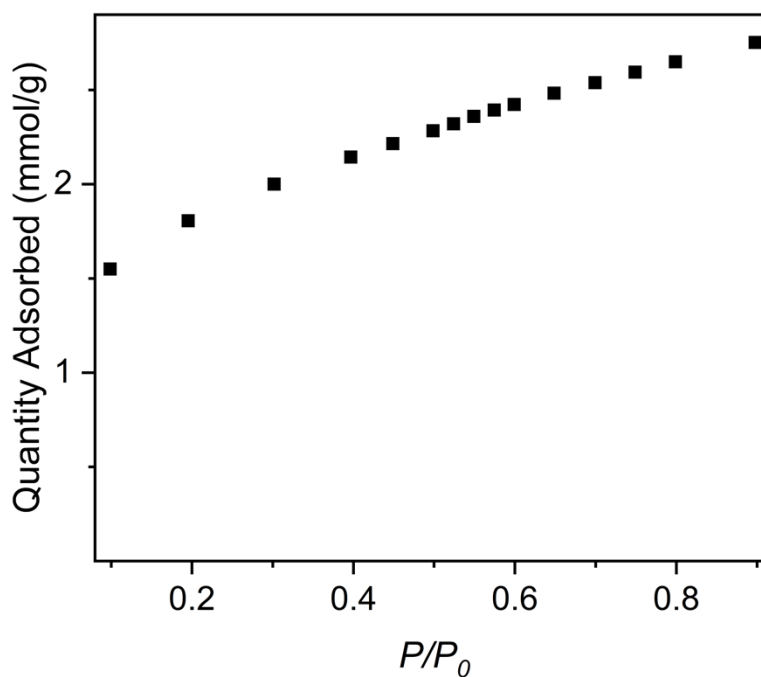

**Figure S23.** CO<sub>2</sub> adsorption in Cu<sub>12</sub>(9-benzyl-cdc)<sub>12</sub> at 195 K. The sample was degassed at 200 °C under flowing N<sub>2</sub>.

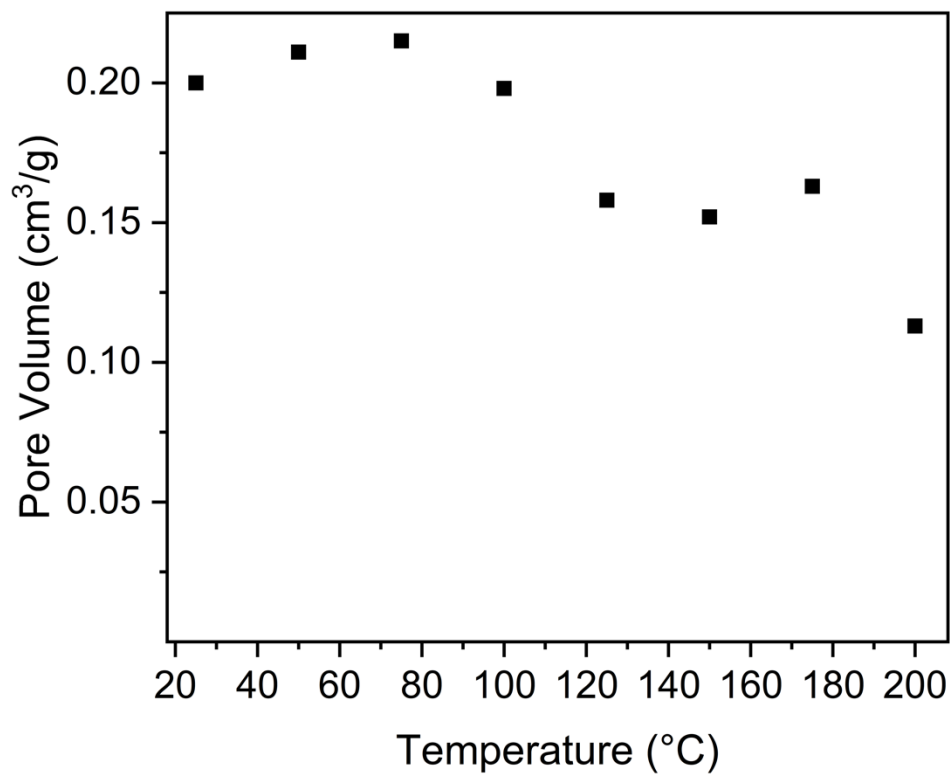

**Figure S24.** Pore volume as a function of activation temperature as determined from CO<sub>2</sub> uptake at P/P<sub>0</sub> of 0.90 at 195 K.

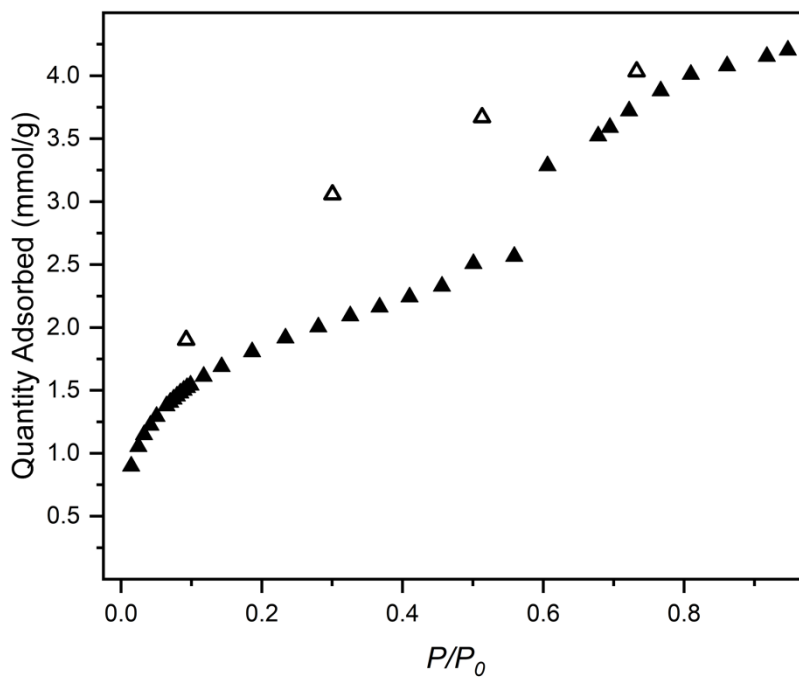

**Figure S25.** CO<sub>2</sub> adsorption in Cu<sub>12</sub>(9-benzyl-cdc)<sub>12</sub> at 195 K. The sample was degassed at 75 °C under flowing N<sub>2</sub>. Filled and open symbols represent adsorption and desorption, respectively.

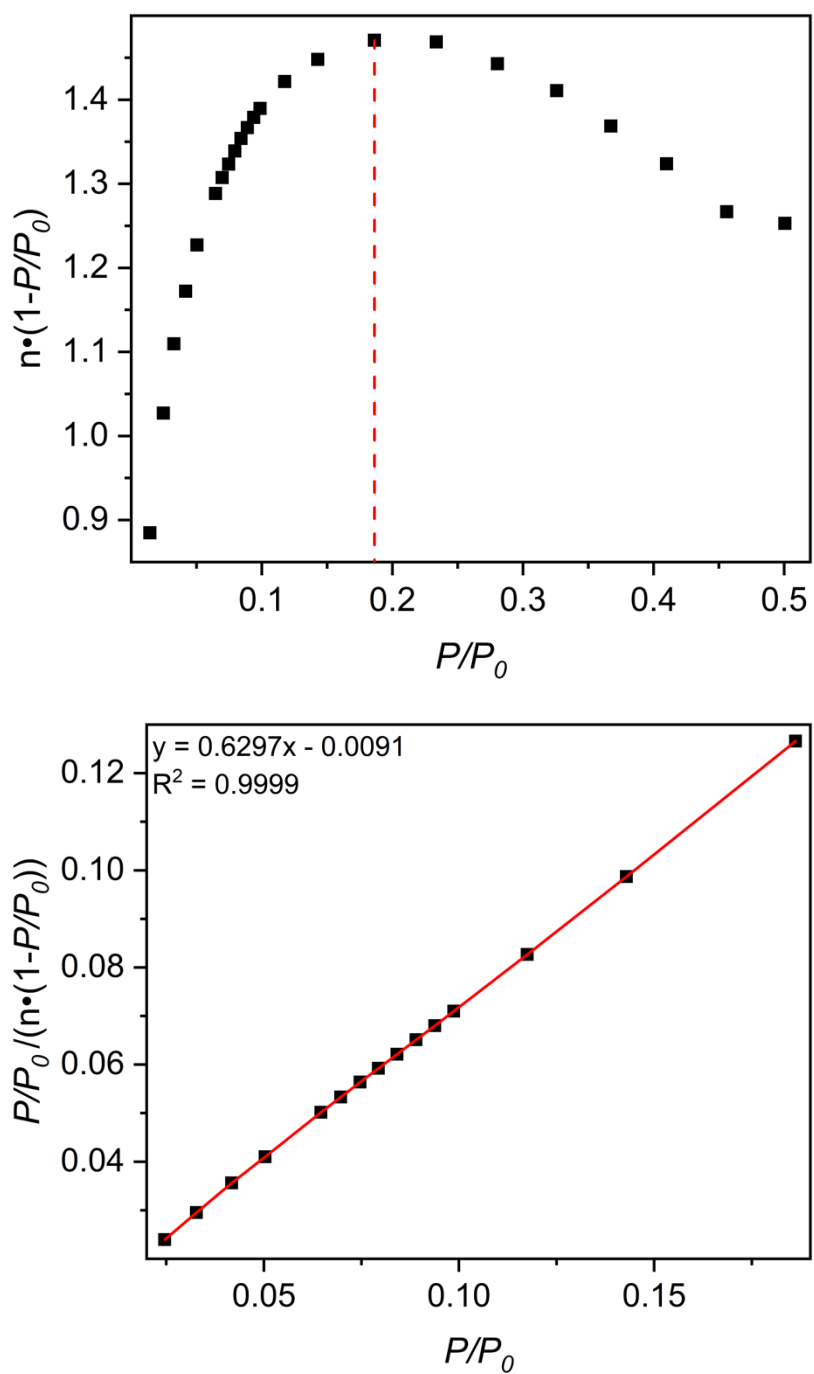

**Figure S26.** BET consistency criteria plots.

# checkCIF/PLATON report

Structure factors have been supplied for datablock(s) eric410

THIS REPORT IS FOR GUIDANCE ONLY. IF USED AS PART OF A REVIEW PROCEDURE FOR PUBLICATION, IT SHOULD NOT REPLACE THE EXPERTISE OF AN EXPERIENCED CRYSTALLOGRAPHIC REFEREE.

No syntax errors found.      CIF dictionary      Interpreting this report

## Datablock: ;/dgp| { n5.8/f kcegv{ nct dc| qrg

---

Bond precision:    C-C = 0.0021 A                      Wavelength=1.54178

Cell:                a=11.9548(5)                b=11.9760(5)                c=14.6392(7)  
                      alpha=85.735(2)                beta=70.006(2)                gamma=60.546(1)

Temperature:    100 K

|                | Calculated   | Reported     |
|----------------|--------------|--------------|
| Volume         | 1703.72(13)  | 1703.72(13)  |
| Space group    | P -1         | P -1         |
| Hall group     | -P 1         | -P 1         |
| Moiety formula | C23 H19 N O2 | C23 H19 N O2 |
| Sum formula    | C23 H19 N O2 | C23 H19 N O2 |
| Mr             | 341.39       | 341.39       |
| Dx,g cm-3      | 1.331        | 1.331        |
| Z              | 4            | 4            |
| Mu (mm-1)      | 0.672        | 0.672        |
| F000           | 720.0        | 720.0        |
| F000'          | 722.08       |              |
| h,k,lmax       | 14,14,17     | 14,14,17     |
| Nref           | 5828         | 5641         |
| Tmin,Tmax      | 0.761,0.842  | 0.625,0.753  |
| Tmin'          | 0.661        |              |

Correction method= # Reported T Limits: Tmin=0.625 Tmax=0.753  
AbsCorr = MULTI-SCAN

Data completeness= 0.968                      Theta(max)= 65.186

R(reflections)= 0.0384( 5297)                wR2(reflections)= 0.1030( 5641)

S = 1.029                                      Npar= 577

---

The following ALERTS were generated. Each ALERT has the format  
**test-name\_ALERT\_alert-type\_alert-level.**  
Click on the hyperlinks for more details of the test.



# checkCIF/PLATON report

Structure factors have been supplied for datablock(s) eric406

THIS REPORT IS FOR GUIDANCE ONLY. IF USED AS PART OF A REVIEW PROCEDURE FOR PUBLICATION, IT SHOULD NOT REPLACE THE EXPERTISE OF AN EXPERIENCED CRYSTALLOGRAPHIC REFEREE.

No syntax errors found.      CIF dictionary      Interpreting this report

## Datablock: 9H-3,6-diacetyl carbazole

---

Bond precision:    C-C = 0.0037 A                      Wavelength=1.54178

Cell:                      a=8.0842(4)              b=11.3339(5)              c=26.9495(13)  
                                    alpha=90                      beta=91.201(4)              gamma=90

Temperature:              110 K

|                | Calculated   | Reported     |
|----------------|--------------|--------------|
| Volume         | 2468.7(2)    | 2468.7(2)    |
| Space group    | P 21/c       | P 21/c       |
| Hall group     | -P 2ybc      | -P 2ybc      |
| Moiety formula | C16 H13 N O2 | C16 H13 N O2 |
| Sum formula    | C16 H13 N O2 | C16 H13 N O2 |
| Mr             | 251.27       | 251.27       |
| Dx,g cm-3      | 1.352        | 1.352        |
| Z              | 8            | 8            |
| Mu (mm-1)      | 0.722        | 0.722        |
| F000           | 1056.0       | 1056.0       |
| F000'          | 1059.19      |              |
| h,k,lmax       | 10,14,33     | 10,14,33     |
| Nref           | 5059         | 5049         |
| Tmin,Tmax      | 0.918,0.939  | 0.559,0.754  |
| Tmin'          | 0.918        |              |

Correction method= # Reported T Limits: Tmin=0.559 Tmax=0.754  
AbsCorr = MULTI-SCAN

Data completeness= 0.998                      Theta(max)= 74.684

R(reflections)= 0.0625( 3613)              wR2(reflections)= 0.1817( 5049)

S = 1.128                      Npar= 402

---

The following ALERTS were generated. Each ALERT has the format  
**test-name\_ALERT\_alert-type\_alert-level.**  
Click on the hyperlinks for more details of the test.

# checkCIF/PLATON report

Structure factors have been supplied for datablock(s) eric412

THIS REPORT IS FOR GUIDANCE ONLY. IF USED AS PART OF A REVIEW PROCEDURE FOR PUBLICATION, IT SHOULD NOT REPLACE THE EXPERTISE OF AN EXPERIENCED CRYSTALLOGRAPHIC REFEREE.

No syntax errors found.      CIF dictionary      Interpreting this report

## Datablock: dimethyl-9-benzyl-3,6-dicarboxylate

---

Bond precision:    C-C = 0.0009 A                      Wavelength=0.71073

Cell:                      a=8.5221(7)              b=18.6073(14)              c=11.5804(8)  
                                    alpha=90              beta=90.784(2)              gamma=90

Temperature:              100 K

|                | Calculated   | Reported     |
|----------------|--------------|--------------|
| Volume         | 1836.2(2)    | 1836.2(2)    |
| Space group    | P 21/c       | P 1 21/c 1   |
| Hall group     | -P 2ybc      | -P 2ybc      |
| Moiety formula | C23 H19 N O4 | C23 H19 N O4 |
| Sum formula    | C23 H19 N O4 | C23 H19 N O4 |
| Mr             | 373.39       | 373.39       |
| Dx,g cm-3      | 1.351        | 1.351        |
| Z              | 4            | 4            |
| Mu (mm-1)      | 0.093        | 0.093        |
| F000           | 784.0        | 784.0        |
| F000'          | 784.39       |              |
| h,k,lmax       | 14,31,19     | 14,31,19     |
| Nref           | 8985         | 8985         |
| Tmin,Tmax      | 0.943,0.971  | 0.707,0.747  |
| Tmin'          | 0.938        |              |

Correction method= # Reported T Limits: Tmin=0.707 Tmax=0.747  
AbsCorr = MULTI-SCAN

Data completeness= 1.000                      Theta(max)= 36.451

R(reflections)= 0.0490( 7542)              wR2(reflections)= 0.1479( 8960)

S = 1.035                      Npar= 307

---

The following ALERTS were generated. Each ALERT has the format

**test-name\_ALERT\_alert-type\_alert-level.**

Click on the hyperlinks for more details of the test.

# checkCIF/PLATON report

Structure factors have been supplied for datablock(s) eric399\_sq

THIS REPORT IS FOR GUIDANCE ONLY. IF USED AS PART OF A REVIEW PROCEDURE FOR PUBLICATION, IT SHOULD NOT REPLACE THE EXPERTISE OF AN EXPERIENCED CRYSTALLOGRAPHIC REFEREE.

No syntax errors found. CIF dictionary Interpreting this report

## Datablock: Ew34\*dgp| { r/ef e+34

---

Bond precision: C-C = 0.0168 A Wavelength=1.54178

Cell: a=20.3600(11) b=21.1957(11) c=23.9825(13)  
alpha=81.376(3) beta=71.855(3) gamma=68.009(3)

Temperature: 109 K

|                        | Calculated                                                      | Reported                           |
|------------------------|-----------------------------------------------------------------|------------------------------------|
| Volume                 | 9112.8(9)                                                       | 9112.7(9)                          |
| Space group            | P -1                                                            | P -1                               |
| Hall group             | -P 1                                                            | -P 1                               |
| Moiety formula         | C287.74 H236.41 Cu12<br>N20.93 O60, 4(C4 H9 N O)<br>[+ solvent] | ?                                  |
| Sum formula            | C303.74 H272.41 Cu12<br>N24.93 O64 [+ solvent]                  | C303.74 H272.41 Cu12<br>N24.93 O64 |
| Mr                     | 6058.39                                                         | 6058.24                            |
| Dx, g cm <sup>-3</sup> | 1.104                                                           | 1.104                              |
| Z                      | 1                                                               | 1                                  |
| Mu (mm <sup>-1</sup> ) | 1.283                                                           | 1.283                              |
| F000                   | 3129.4                                                          | 3129.0                             |
| F000'                  | 3114.63                                                         |                                    |
| h,k,lmax               | 18,19,21                                                        | 18,19,21                           |
| Nref                   | 14353                                                           | 14136                              |
| Tmin,Tmax              | 0.843,0.939                                                     | 0.615,0.749                        |
| Tmin'                  | 0.781                                                           |                                    |

Correction method= # Reported T Limits: Tmin=0.615 Tmax=0.749  
AbsCorr = MULTI-SCAN

Data completeness= 0.985 Theta(max)= 44.516

R(reflections)= 0.0849( 9917) wR2(reflections)= 0.2718( 14136)

S = 1.035 Npar= 1833
